# Supplementary material
Source: PubMed Central journal article supplement (PMC2148420)

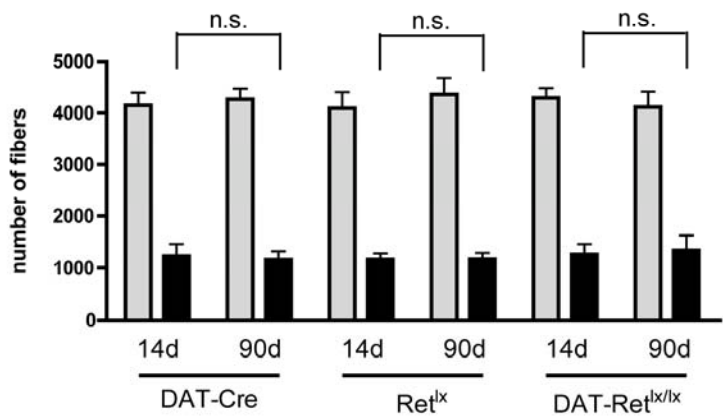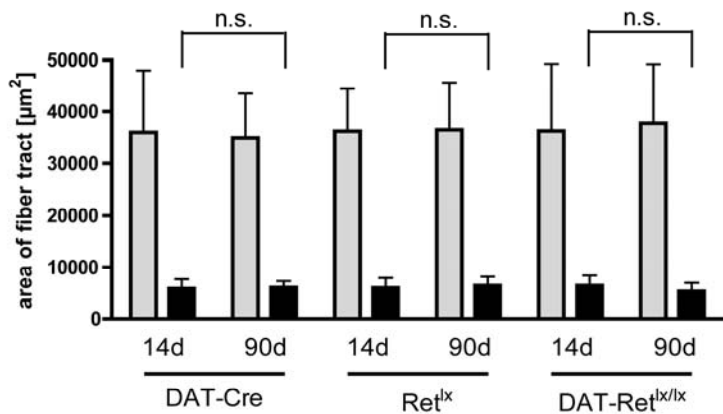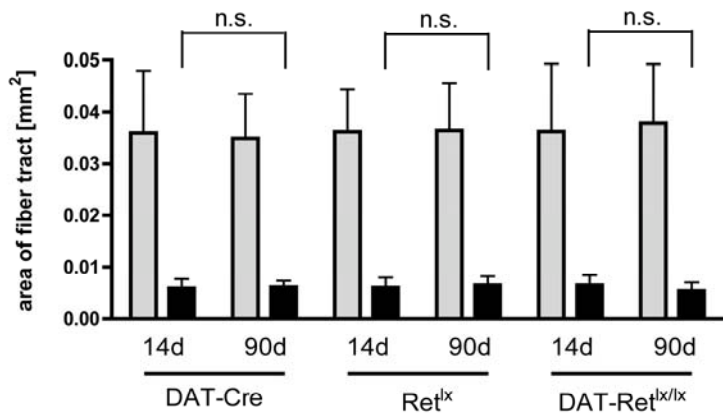

Supplement: pnas_0706177104_1.pdf [file pnas_0706177104_1.pdf]

**DAT-Cre**

-

-

+

+

-

-

+

+

-

-

+

+

DAT

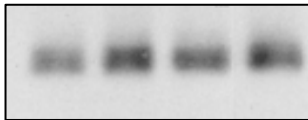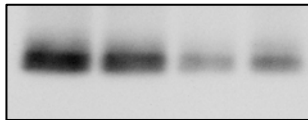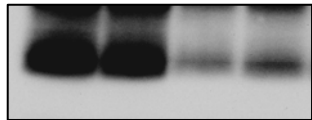

$\alpha$ -tubulin

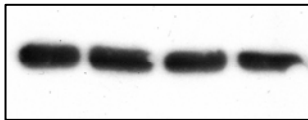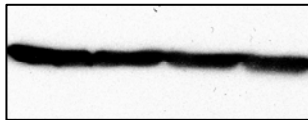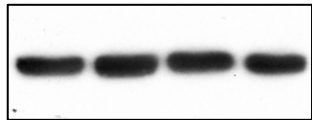

**3 months**

**12 months**

**24 months**

Supplement: pnas_0706177104_2.pdf [file pnas_0706177104_2.pdf]

A

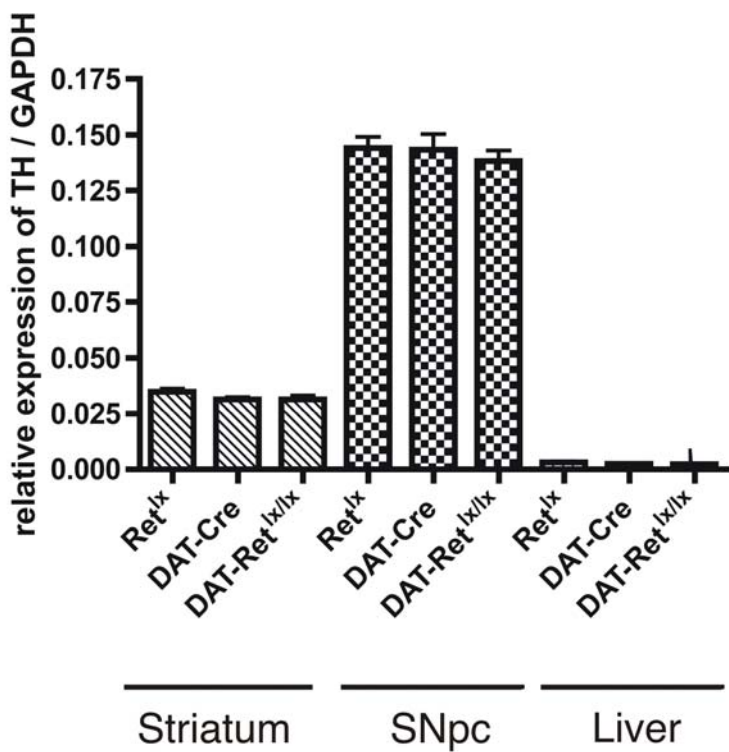

B

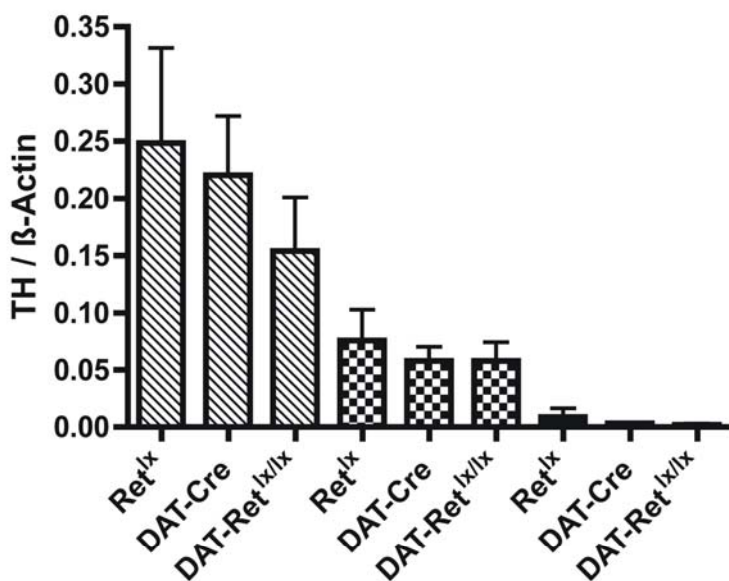

C

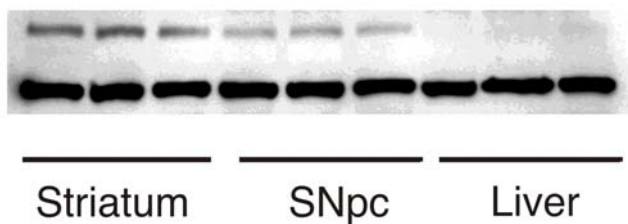

Supplement: pnas_0706177104_3.pdf [file pnas_0706177104_3.pdf]
